# Supplementary material
Source: PubMed Central journal article supplement (PMC6319622)
Supplement: NIHMS997997-supplement-Supp.pdf [file NIHMS997997-supplement-Supp.pdf]

## Supplemental Figure 1

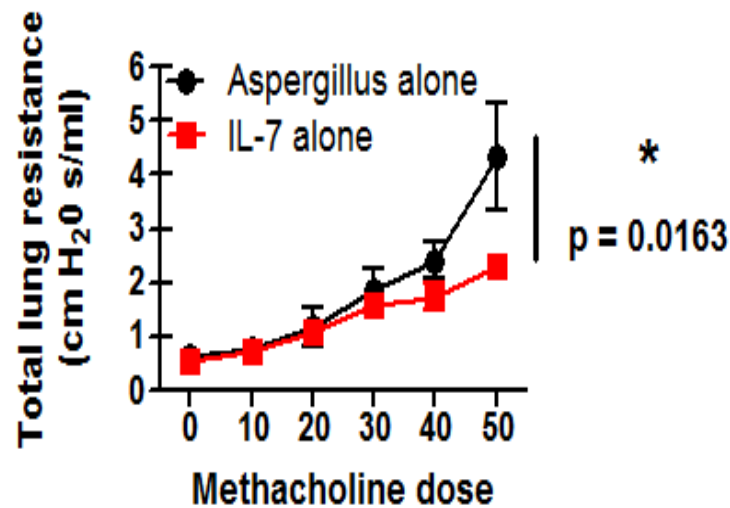

**Supplemental Figure 1. IL-7 administration in the absence of chronic *A. fumigatus* exposure does not affect lung function.** C57BL/6 wild-type mice were either subjected to experimental fungal asthma (administered  $1 \times 10^7$  live *A. fumigatus* conidia on day 0, then starting on day 7, administered  $1 \times 10^6$  conidia live *A. fumigatus* conidia daily for 5 days (days 7, 8, 9, 10 and 11), rested for 2 days (days 12 and 13), and challenged daily for another 3 days (days 14, 15 and 16) – Aspergillus alone group) or administered 1.5  $\mu$ g of carrier-free recombinant murine IL-7 on days 7, 9, 11 and 14 (IL-7 alone group). On day 17, dynamic lung resistance was analyzed via mechanical ventilation using the flexiVent system.

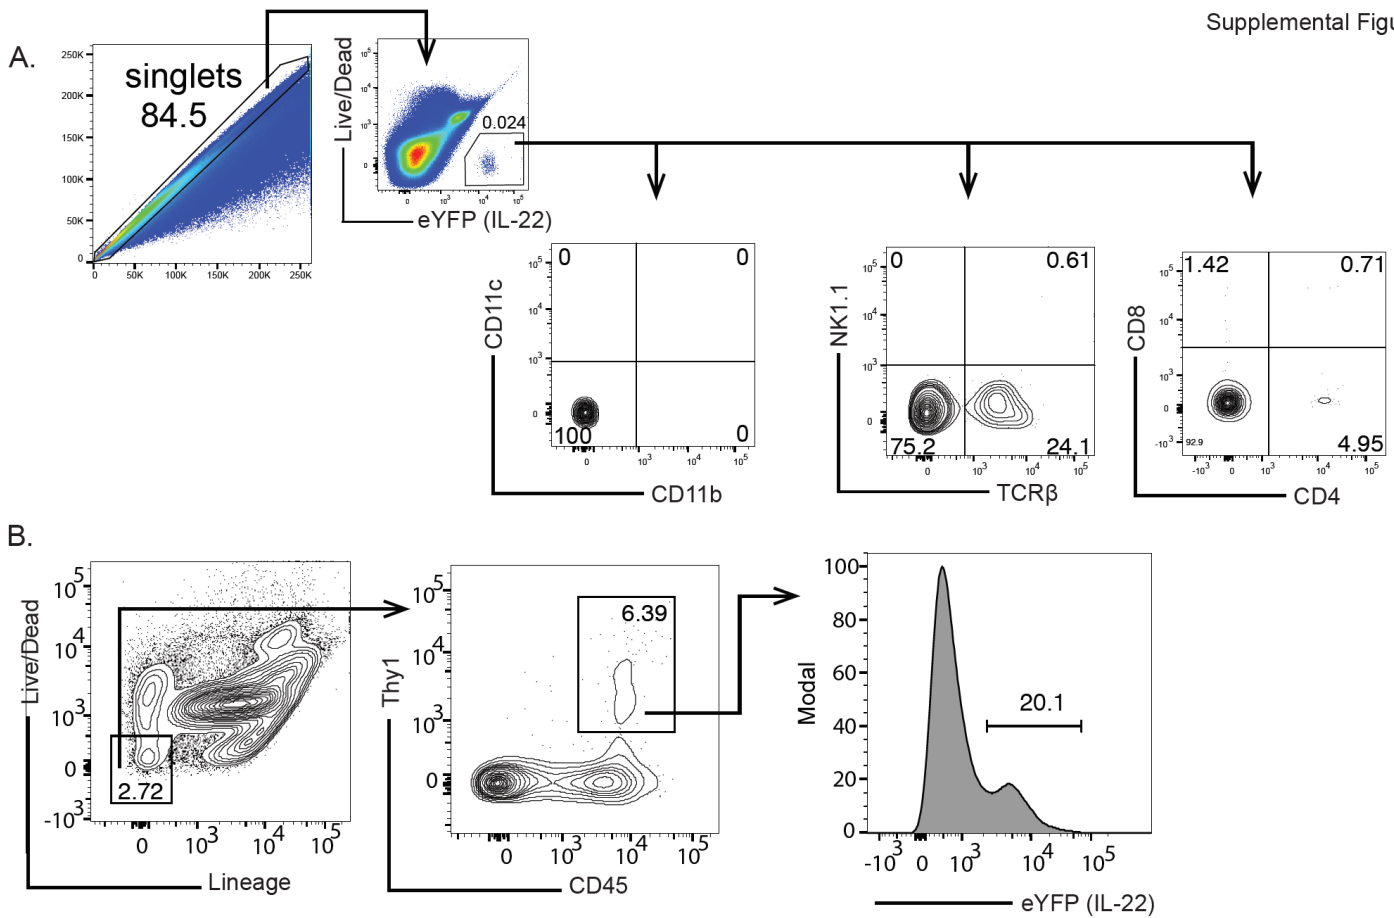

**Supplemental Figure 2. IL-22 cell sources during experimental fungal asthma.** IL-22<sup>CreR26R</sup>eYFP mice were generated, subjected to experimental fungal asthma and analyzed for eYFP (IL-22) expression. **(A)** CD11b<sup>+</sup>, CD11c<sup>+</sup>, and CD11b<sup>+</sup>/CD11c<sup>+</sup> cells were negative for eYFP (left plot), as were NK1.1<sup>+</sup> cells (middle plot). CD8<sup>+</sup> cells were slightly positive for eYFP (right plot), although a distinct CD4<sup>+</sup>/eYFP<sup>+</sup> population was observed (right plot). **(B)** Lineage negative cells (left plot – negative for CD11b, CD11c, CD3, CD4, CD8a, CD19, Gr1, Fc $\epsilon$ R1, KLRG1,  $\gamma\delta$  TCR and NKp46) were examined for Thy1 and CD45 expression (middle plot). Thy1<sup>+</sup>/CD45<sup>+</sup> double positive cells (middle plot) were examined for eYFP expression (right plot).
